# Supplementary material for: Safety of Early Administration of Apixaban on Clinical Outcomes in Patients with Acute Large Vessel Occlusion
Source: PubMed Central journal article supplement (PMC7925454; doi:10.1007/s12975-020-00839-4), 2020-08-07
Supplement: 12975_2020_839_MOESM1_ESM.pdf [file 12975_2020_839_MOESM1_ESM.pdf]

## SUPPLEMENTAL MATERIAL

Safety of Early Administration of Apixaban on Clinical Outcomes in Patients with Acute Large Vessel Occlusion

## Supplemental Table I. Study Investigators

| Institutes                                                         | Investigators      |
|--------------------------------------------------------------------|--------------------|
| 1 Hyogo College of Medicine                                        | Shinichi Yoshimura |
| 2 Nishinomiya Kyouritsu Neurosurgical Hospital                     | Kotaro Tatebayashi |
| 3 Seisho Hospital                                                  | Masataka Takeuchi  |
| 4 National Cerebral and Cardiovascular Center                      | Kazunori Toyoda    |
| 5 Iwate Prefectural Central Hospital                               | Naoto Kimura       |
| 6 Yoshida Hospital.Cerebrovascular Research Institute              | Ikuya Yamaura      |
| 7 Sapporo Shiroishi Memorial Hospital                              | Tadashi Nonaka     |
| 8 Showa University Koto Toyosu Hospital                            | Yuki Kamiya        |
| 9 Hirosaki University                                              | Hiroki Okuma       |
| 10 Kobe City Medical Center General Hospital                       | Nobuyuki Sakai     |
| 11 Yokohama Shintoshi Neurosurgical Hospital                       | Masafumi Morimoto  |
| 12 Goshi Hospital                                                  | Yoshiharu Oki      |
| 13 Sato Daiichi Hospital                                           | Shigehiro Nakahara |
| 14 Kokura Kinen Hospital                                           | Taketo Hatano      |
| 15 Gifu University                                                 | Yukiko Enomoto     |
| 16 Fukuoka University Chikushi Hospital                            | Kohei Nii          |
| 17 Hakodate Shintoshi Hospital                                     | Koichi Haraguchi   |
| 18 Kurashiki Central Hospital                                      | Akira Handa        |
| 19 National Hospital Organization Osaka Minami Medical Center      | Junya Kobayashi    |
| 20 Japan Community Health care Organinzation Kobe Central Hospital | Keigo Matsumoto    |
| 21 Mie University Hospital                                         | Naoki Toma         |
| 22 MAZDA Hospital                                                  | Ryo Ogami          |
| 23 Shimizu Hospital                                                | Fuminori Shimizu   |
| 24 Kyoritsu Hospital                                               | Tomoko Iida        |
| 25 Kindai University                                               | Amami Kato         |
| 26 Miyakonojo Medical Association Hospital                         | Shunro Uchinokura  |
| 27 Tokyo Metropolitan Tama Medical Center                          | Takahiro Ota       |
| 28 Ube-kohsan Central Hospital                                     | Norio Ikeda        |
| 29 Japanese Red Cross Kyoto Daiichi Hospital                       | Keisuke Imai       |
| 30 Osaka University Hospital                                       | Kenichi Todo       |

|    |                                            |                |
|----|--------------------------------------------|----------------|
| 31 | Kagawa University Hospital                 | Atsushi Shindo |
| 32 | Hirosaki Stroke and Rehabilitation Center  | Joji Hagii     |
| 33 | Kyoto University                           | Akira Ishi     |
| 34 | Yamaguchi Prefectural Grand Medical Center | Hiroaki Yasuda |
| 35 | Sanda City Hospital                        | Akinori Nose   |
| 36 | Kinki Central Hospital                     | Junji Ueda     |
| 37 | Toranomon Hospital                         | Wataro Tsuruta |
| 38 | Japanese Red Cross Nagoya Daini Hospital   | Keizo Yasui    |

Supplemental Table II. Patients' characteristics between those with and without the primary outcome

|                                             | Early group (n=263)            |                                    | P Values |
|---------------------------------------------|--------------------------------|------------------------------------|----------|
|                                             | With primary outcome<br>(n=46) | Without primary outcome<br>(n=217) |          |
| Age, years, mean (SD)                       | 77.0 (11.9)                    | 76.5 (10.1)                        | 0.74     |
| Male, n (%)                                 | 24 (52.2)                      | 118 (54.4)                         | 0.79     |
| mRS before onset 0 or 1, n (%)              | 32/45<br>(71.1)                | 187/213<br>(87.8)                  | 0.005    |
| NIHSS, median [IQR]                         | 16 [10-23]                     | 12 [6-17]                          | 0.009    |
| ASPECTS, median [IQR]                       | 9 [6-10]<br>(n=9)              | 9 [8-9]<br>(n=46)                  | 0.52     |
| DWI ASPECTS, median [IQR]                   | 7 [6-8]<br>(n=29)              | 8 [7-9]<br>(n=160)                 | 0.02     |
| pc-ASPECTS, median [IQR]                    | 9 [8-10]<br>(n=11)             | 8 [7-9]<br>(n=26)                  | 0.03     |
| History of cerebral infarction, n (%)       | 12 (14.3)                      | 31 (26.1)                          | 0.049    |
| History of cerebral hemorrhage, n (%)       | 0 (0)                          | 0 (0)                              | 0        |
| History of transient ischemic attack, n (%) | 1 (2.0)                        | 0 (0)                              | 0.17     |
| History of subarachnoid hemorrhage, n (%)   | 0 (0)                          | 1 (0.5)                            | 1.00     |
| History of myocardial infarction, n (%)     | 3 (6.5)                        | 7 (3.2)                            | 0.39     |
| History of unstable angina, n (%)           | 1 (2.2)                        | 4 (1.8)                            | 1.00     |
| History of coronary artery disease, n (%)   | 1 (2.2)                        | 12 (5.5)                           | 0.48     |
| CHA2DS2-VASc, median [IQR]                  | 3 [2-4]                        | 2 [2-3]                            | 0.047    |
| Prior antiplatelet drug, n (%)              | 14 (30.4)                      | 39 (18.0)                          | 0.056    |
| Prior anticoagulant drug, n (%)             | 14 (30.4)                      | 48 (22.1)                          | 0.23     |
| Occlusion, n (%)                            | 45 (97.8)                      | 205 (94.5)                         | 0.34     |
| Anterior circulation occlusion, n (%)       | 36 (78.3)                      | 181 (83.4)                         | 0.40     |
| Internal carotid artery , n (%)             | 6 (13.0)                       | 32 (14.8)                          | 0.77     |
| M1 segment middle cerebral artery, n (%)    | 16 (34.8)                      | 66 (30.4)                          | 0.56     |
| Stenosis, n (%)                             | 4 (8.7)                        | 17 (7.8)                           | 0.84     |
| Laboratories                                |                                |                                    |          |

|                                      |                  |                  |      |
|--------------------------------------|------------------|------------------|------|
| Creatinine, mg/dL, median [IQR]      | 0.88 [0.66-1.09] | 0.80 [0.67-0.97] | 0.14 |
| Blood glucose, mg/dL, median [IQR]   | 131 [110-151]    | 117 [105-136]    | 0.02 |
| CRP, mg/dL, median [IQR]             | 0.15 [0.09-0.87] | 0.15 [0.09-0.98] | 0.93 |
| PT-INR, median [IQR]                 | 1.04 [0.96-1.16] | 1.03 [0.98-1.11] | 0.99 |
| LDL cholesterol, mg/dL, median [IQR] | 112 [88-140]     | 114 [91-129]     | 0.90 |
| HbA1c (NGSP), %, median [IQR]        | 5.8 [5.7-6.1]    | 5.9 [5.6-6.2]    | 0.55 |
| Initial treatment                    |                  |                  |      |
| rt-PA, n (%)                         | 25 (54.4)        | 96 (44.2)        | 0.21 |
| EVT, n (%)                           | 34 (73.9)        | 129 (59.5)       | 0.07 |
| TICI 2b or 3, n (%)                  | 33 (97.1)        | 119 (92.3)       | 0.32 |
|                                      | (n=34)           | (n=129)          |      |
| modified Mori Grade 3, n (%)         | 23 (92.0)        | 7 (91.2)         | 0.90 |
|                                      | (n=25)           | (n=102)          |      |

#### Late group (n=423)

|                                             | With primary<br>outcome<br>(n=64) | Without primary<br>outcome<br>(n=359) | P Values |
|---------------------------------------------|-----------------------------------|---------------------------------------|----------|
| Age, years, mean (SD)                       | 80.3 (8.3)                        | 77.8 (9.4)                            | 0.053    |
| Male, n (%)                                 | 35 (54.7)                         | 180 (50.1)                            | 0.50     |
| mRS before onset 0 or 1, n (%)              | 48/64<br>(75.0)                   | 270/352<br>(76.7)                     | 0.77     |
| NIHSS, median [IQR]                         | 15 [5-22]                         | 14 [6-20]                             | 0.62     |
| ASPECTS, median [IQR]                       | 8 [6-9]<br>(n=15)                 | 8 [6-9]<br>(n=89)                     | 0.82     |
| DWI ASPECTS, median [IQR]                   | 7 [6-8]<br>(n=44)                 | 7 [6-9]<br>(n=258)                    | 0.19     |
| pc-ASPECTS, median [IQR]                    | 8 [7-9]<br>(n=7)                  | 9 [8-9]<br>(n=42)                     | 0.49     |
| History of cerebral infarction, n (%)       | 18 (28.1)                         | 56 (15.6)                             | 0.020    |
| History of cerebral hemorrhage, n (%)       | 1 (1.6)                           | 8 (2.2)                               | 1.00     |
| History of transient ischemic attack, n (%) | 0 (0)                             | 5 (1.4)                               | 1.00     |
| History of subarachnoid hemorrhage, n (%)   | 0 (0)                             | 3 (0.8)                               | 1.00     |
| History of myocardial infarction, n (%)     | 0 (0)                             | 10 (2.8)                              | 0.37     |
| History of unstable angina, n (%)           | 0 (0)                             | 8 (2.2)                               | 0.61     |

|                                           |                  |                  |      |
|-------------------------------------------|------------------|------------------|------|
| History of coronary artery disease, n (%) | 2 (3.1)          | 21 (5.9)         | 0.55 |
| CHA2DS2-VASc, median [IQR]                | 3 [2-4]          | 3 [2-4]          | 0.03 |
| Prior antiplatelet drug, n (%)            | 17 (26.6)        | 68 (18.9)        | 0.16 |
| Prior anticoagulant drug, n (%)           | 18 (28.1)        | 80 (22.3)        | 0.31 |
| Occlusion, n (%)                          | 56(87.5)         | 331 (92.2)       | 0.21 |
| Anterior circulation occlusion, n (%)     | 50 (78.1)        | 285 (79.4)       | 0.87 |
| Internal carotid artery , n (%)           | 13 (20.3)        | 47 (13.1)        | 0.13 |
| M1 segment middle cerebral artery, n (%)  | 19 (29.7)        | 130 (36.2)       | 0.31 |
| Stenosis, n (%)                           | 9 (14.1)         | 33 (9.2)         | 0.23 |
| Laboratories                              |                  |                  |      |
| Creatinine, mg/dL, median [IQR]           | 0.80 [0.62-1.08] | 0.79 [0.65-0.98] | 0.90 |
| Blood glucose, mg/dL, median [IQR]        | 128 [110-148]    | 122 [105-143]    | 0.17 |
| CRP, mg/dL, median [IQR]                  | 0.17 [0.08-1.20] | 0.15 [0.07-0.60] | 0.32 |
| PT-INR, median [IQR]                      | 1.08 [1.02-1.17] | 1.05 [0.98-1.15] | 0.17 |
| LDL cholesterol, mg/dL, median [IQR]      | 105 [80-124]     | 109 [89-131]     | 0.08 |
| HbA1c (NGSP), %, median [IQR]             | 6.0 [5.7-6.5]    | 5.9 [5.6-.6.2]   | 0.13 |
| Initial treatment                         |                  |                  |      |
| rt-PA, n (%)                              | 16 (25.0)        | 131 (36.5)       | 0.08 |
| EVT, n (%)                                | 26 (47.1)        | 169 (47.1)       | 0.34 |
| TICI 2b or 3, n (%)                       | 23 (88.5)        | 154 (91.1)       | 0.66 |
|                                           | (n=26)           | (n=169)          |      |
| modified Mori Grade 3, n (%)              | 12 (85.7)        | 114 (86.4)       | 1.00 |
|                                           | (n=14)           | (n=132)          |      |

DWI ASPECTS, Alberta Stroke Program Early CT Score on Diffusion-Weighted Imaging; ASPECTS, Alberta Stroke Program Early CT Score; CRP, C-reactive protein; EVT, endovascular therapy; IQR, interquartile range; LDL, low-density lipoprotein; mRS, modified Rankin scale; NGSP, National Glycohemoglobin Standardization Program; NIHSS, National Institute of Health Stroke Scale; pc-ASPECTS, Posterior circulation-Alberta Stroke Program Early CT Score on Diffusion-Weighted Imaging; PT-INR, prothrombin time - international normalized ratio; rt-PA, recombinant tissue plasminogen activator; SD, standard deviation; TICI, thrombolysis in cerebral infarction grading system

Supplemental Table III. Bleeding events within 30 days after apixaban administration

| Early group | Age (years) | Gender | Time of administration of apixaban (day) | Time of bleeding after administration of apixaban (day) | NIHSS | DW ASPECTS or pc-ASPECTS | Site of occlusion | Pit (10 <sup>4</sup> / $\mu$ L) | Glu (mg/dL) | PT-INR | r-t-PA | EVT | Use of antiplatelet therapy before onset | Use of anticoagulant therapy before onset | Bleeding events            |
|-------------|-------------|--------|------------------------------------------|---------------------------------------------------------|-------|--------------------------|-------------------|---------------------------------|-------------|--------|--------|-----|------------------------------------------|-------------------------------------------|----------------------------|
| 1           | 75          | Male   | 0                                        | 0                                                       | 2     | 7                        | M1P               | 14                              | 96          | 1.16   | No     | Yes | No                                       | Yes                                       | ICH                        |
| 2           | 78          | Male   | 0                                        | 10                                                      | 2     | 7                        | BA                | 7.5                             | 126         | 1      | No     | Yes | Yes                                      | No                                        | HC                         |
| 3           | 87          | Female | 1                                        | 1                                                       | 9     | 10                       | P2                | 37.5                            | 134         | 1.08   | Yes    | No  | Yes                                      | No                                        | Unknown                    |
| 4           | 78          | Female | 1                                        | 3                                                       | 25    | 5                        | M1D               | 21.3                            | 95          | 1.08   | No     | Yes | No                                       | No                                        | GIB                        |
| 5           | 69          | Female | 1                                        | 4                                                       | 14    | 9                        | ICA               | 21.1                            | 113         | 0.98   | No     | Yes | Yes                                      | No                                        | Retroperitoneal hemorrhage |
| 6           | 67          | Male   | 1                                        | 4                                                       | 16    | 10                       | VA                | 29.7                            | 189         | 1.16   | Yes    | Yes | No                                       | Yes                                       | HC                         |
| 7           | 80          | Female | 1                                        | 12                                                      | 19    | 7                        | M1D               | 20.5                            | 135         | 1.09   | No     | Yes | No                                       | No                                        | GIB                        |
| 8           | 73          | Male   | 1                                        | 21                                                      | 16    | 0                        | EICA              | 21.3                            | 134         | 0.9    | No     | No  | No                                       | Yes                                       | GIB                        |
| 9           | 94          | Female | 1                                        | 26                                                      | 3     | 7                        | M2                | 14.9                            | 160         | 0.83   | Yes    | Yes | No                                       | No                                        | HC                         |
| Late group  |             |        |                                          |                                                         |       |                          |                   |                                 |             |        |        |     |                                          |                                           |                            |
| 10          | 81          | Female | 2                                        | 12                                                      | 22    | 6                        | M1P               | 31.6                            | 144         | 0.99   | No     | No  | Yes                                      | No                                        | GIB                        |
| 11          | 85          | Male   | 2                                        | 14                                                      | 14    | 8                        | M1P               | 15.1                            | 133         | 1.07   | No     | Yes | Yes                                      | No                                        | ICH                        |
| 12          | 80          | Female | 2                                        | 18                                                      | 24    | 8                        | EICA              | 29.8                            | 121         | 1      | No     | Yes | No                                       | Yes                                       | HC                         |
| 13          | 75          | Female | 3                                        | 1                                                       | 23    | 7                        | BA                | 28.7                            | 132         | 0.91   | No     | Yes | No                                       | No                                        | GIB                        |
| 14          | 76          | Male   | 3                                        | 4                                                       | 23    | 9                        | M1P               | 30.3                            | 113         | 1.32   | No     | Yes | No                                       | Yes                                       | HC                         |
| 15          | 82          | Male   | 5                                        | 2                                                       | 10    | 9                        | M3                | 34                              | 148         | 1.61   | No     | No  | No                                       | Yes                                       | HC                         |
| 16          | 59          | Male   | 5                                        | 5                                                       | 16    | 8                        | P1                | 22.1                            | 106         | 1.13   | No     | No  | Yes                                      | No                                        | HC                         |
| 17          | 74          | Male   | 5                                        | 6                                                       | 1     | 9                        | VA                | 14.4                            | 111         | 1.03   | No     | No  | No                                       | No                                        | ICH                        |
| 18          | 68          | Female | 5                                        | 16                                                      | 9     | 4                        | M2                | 18.2                            | 130         | 0.97   | No     | No  | No                                       | No                                        | HC                         |
| 19          | 82          | Female | 7                                        | 5                                                       | 19    | 7                        | ICA               | 19.4                            | 228         | 1.02   | No     | Yes | No                                       | No                                        | GIB                        |
| 20          | 77          | Male   | 12                                       | 4                                                       | 7     | 9                        | P1                | 18.5                            | 177         | 1.06   | Yes    | No  | Yes                                      | No                                        | Nose bleeding              |
| 21          | 81          | Male   | 12                                       | 16                                                      | 5     | 8                        | Both M1P          | 26.9                            | 135         | 1.25   | Yes    | Yes | No                                       | Yes                                       | GIB                        |

ICA: Internal carotid artery (intracranial), EICA: Internal carotid artery (extracranial), M1P: M1 proximal, M1D: M1 distal, BA: Basilar artery, VA: Vertebral artery, ICH: Cerebral hemorrhage, HC: Hemorrhagic change after infarction, GIB: Gastrointestinal bleeding, Unknown: Unknown of bleeding source but progression of anemia.

Supplemental Figure. Cumulative incidences of outcomes after the onset of acute large vessel occlusions

A: Composite event of all-cause death, ISTH major bleedings, and ischemic events

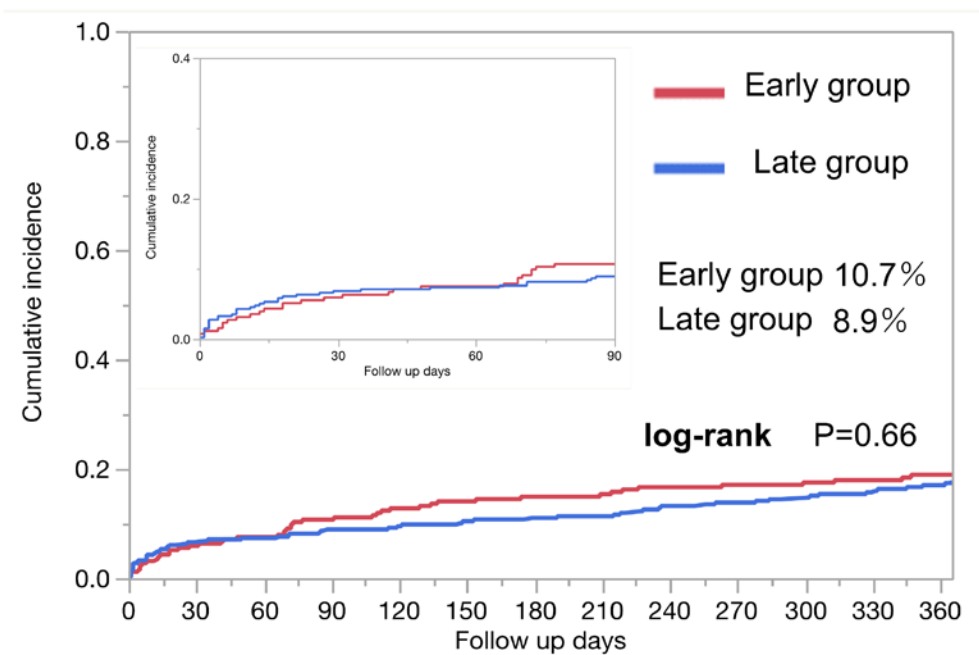

Number of patients at risk

| Days        | 0   | 30  | 90  | 365 |
|-------------|-----|-----|-----|-----|
| Early group | 263 | 238 | 223 | 124 |
| Late group  | 423 | 364 | 342 | 181 |



B: All-cause death

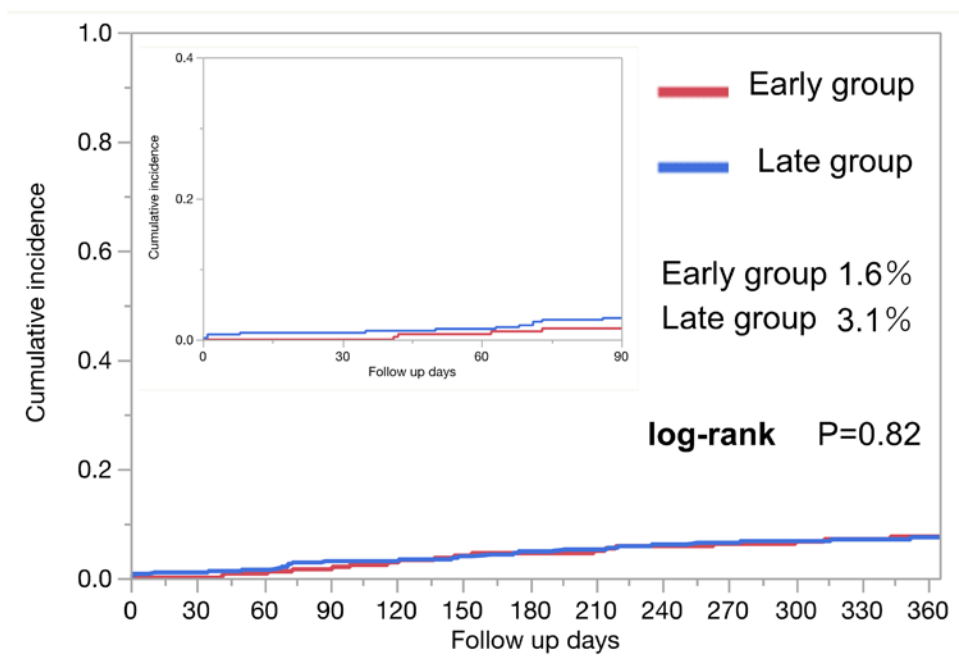

Number of patients at risk

| Days        | 0   | 30  | 90  | 365 |
|-------------|-----|-----|-----|-----|
| Early group | 263 | 254 | 246 | 142 |
| Late group  | 423 | 385 | 362 | 201 |

C: ISTH major bleedings

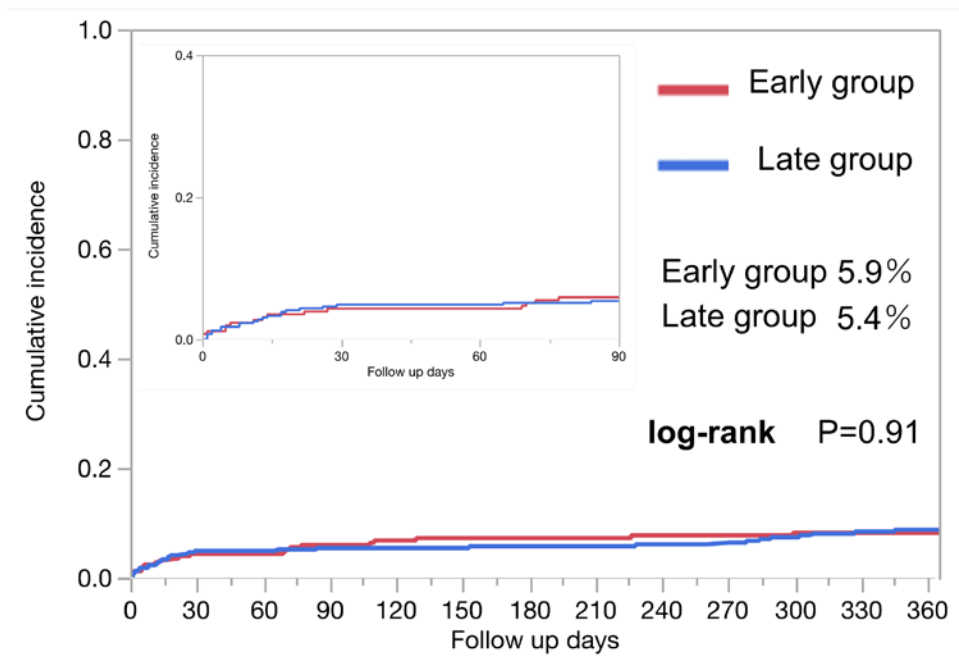

Number of patients at risk

| Days        | 0   | 30  | 90  | 365 |
|-------------|-----|-----|-----|-----|
| Early group | 263 | 242 | 232 | 132 |
| Late group  | 423 | 367 | 345 | 187 |

D: Ischemic events

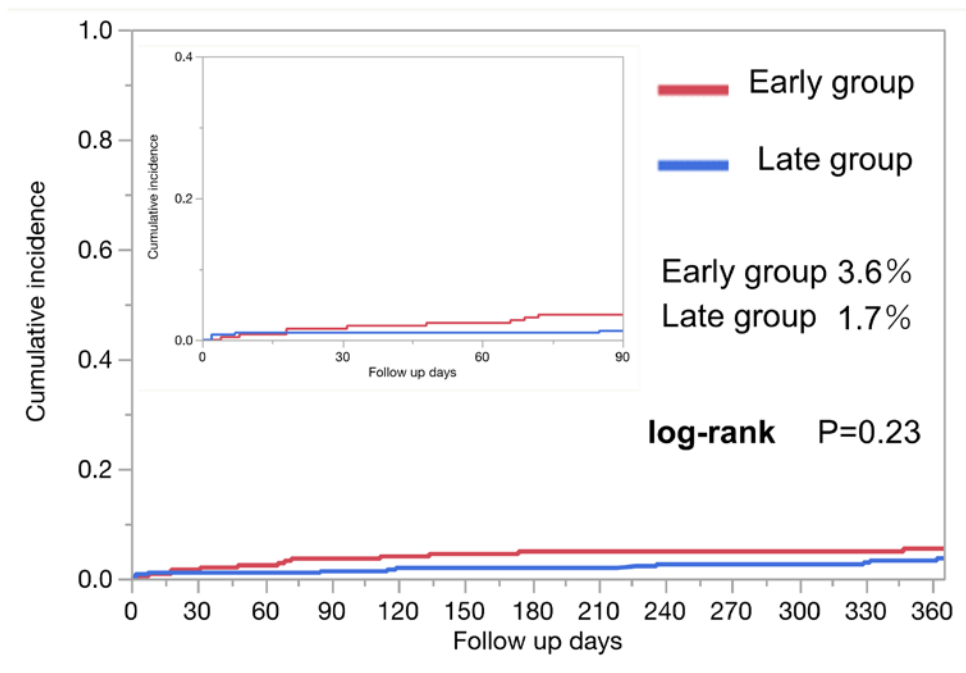

Number of patients at risk

| Days        | 0   | 30  | 90  | 365 |
|-------------|-----|-----|-----|-----|
| Early group | 263 | 250 | 238 | 136 |
| Late group  | 423 | 382 | 360 | 197 |
